# Supplementary material for: Sensitivity of asymmetric Oxygen Minimum Zones toremineralization rate and mixing intensity in the tropical Pacificusing a basin-scale model (OGCM-DMEC V1.2)
Source: Copernicus journal article supplement (doi:10.5194/gmd-2020-431), 2021-03-04
Supplement: Supplementary file [file gmd-2020-431-AC1-supplement.pdf]

Thanks for the constructive comments. Since this is a model evaluation paper (not model development paper), we only provide a brief description on OGCM and biogeochemical model. But, we could add some details particularly for the biogeochemical model if space is allowed. Oxygen has been a state variable (just like carbon and nitrogen) in the basin-scale biogeochemical model. Most parameters used to compute the sources/sinks of oxygen are the same as those for nitrogen and carbon cycles. We analyzed/validated many biogeochemical variables in our previous studies, e.g., chlorophyll (Wang *et al.*, 2009a; Wang *et al.*, 2013), nitrogen uptake and regeneration (Wang *et al.*, 2009b) and carbon cycling (Wang *et al.*, 2006b; Wang *et al.*, 2015). In addition, we reported/validated PP & NCP (Wang *et al.*, 2006b), new production (Wang *et al.*, 2006a), and nitrate, iron, POC/detritus and export production below 200 m (Yu *et al.*, 2021). Although this is the first manuscript reporting mode calibration and validation for oxygen cycle, we have presented some findings on oxygen cycle modeling at a few international conferences, e.g., AGU Fall Meeting 2016, AOGS Annual Meeting 2016, SFB754 (2018) and 2018 Climate Change Symposium.

- Wang, X. J., Behrenfeld, M., Le Borgne, R., Murtugudde, R. & Boss, E. (2009a). Regulation of phytoplankton carbon to chlorophyll ratio by light, nutrients and temperature in the Equatorial Pacific Ocean: a basin-scale model. *Biogeosciences* 6(3): 391-404.
- Wang, X. J., Christian, J. R., Murtugudde, R. & Busalacchi, A. J. (2006a). Spatial and temporal variability in new production in the equatorial Pacific during 1980-2003: Physical and biogeochemical controls. *Deep-Sea Research Part II* 53(5-7): 677-697.
- Wang, X. J., Christian, J. R., Murtugudde, R. & Busalacchi, A. J. (2006b). Spatial and temporal variability of the surface water pCO<sub>2</sub> and air-sea CO<sub>2</sub> flux in the equatorial Pacific during 1980-2003: a basin-scale carbon cycle model. *Journal of Geophysical Research* 111(C7): C07S04, doi:10.1029/2005JC002972.
- Wang, X. J., Le Borgne, R. & Murtugudde, R. (2009b). Nitrogen uptake and regeneration pathways in the equatorial Pacific: a basin scale modeling study. *Biogeosciences* 6: 2647-2660.
- Wang, X. J., Murtugudde, R., Hackert, E., Wang, J. & Beauchamp, J. (2015). Seasonal to decadal variations of sea surface pCO<sub>2</sub> and sea-air CO<sub>2</sub> flux in the equatorial oceans over 1984-2013: A basin-scale comparison of the Pacific and Atlantic Oceans. *Global Biogeochemical Cycles* 29(5): 597-609.
- Wang, X. J., Murtugudde, R., Hackert, E. & Maranon, E. (2013). Phytoplankton carbon and chlorophyll distributions in the equatorial Pacific and Atlantic: A basin-scale comparative study. *Journal of Marine Systems* 109: 138-148.
- Yu, J., Wang, X., Murtugudde, R., Tian, F. & Zhang, R.-H. (2021). Interannual-to-Decadal Variations of Particulate Organic Carbon and the Contribution of Phytoplankton in the Tropical Pacific During 1981–2016: A

Model Study. *Journal of Geophysical Research: Oceans* 126(1):  
e2020JC016515.
